# Supplementary material
Source: PubMed Central journal article supplement (PMC3636539)

Figure S1.

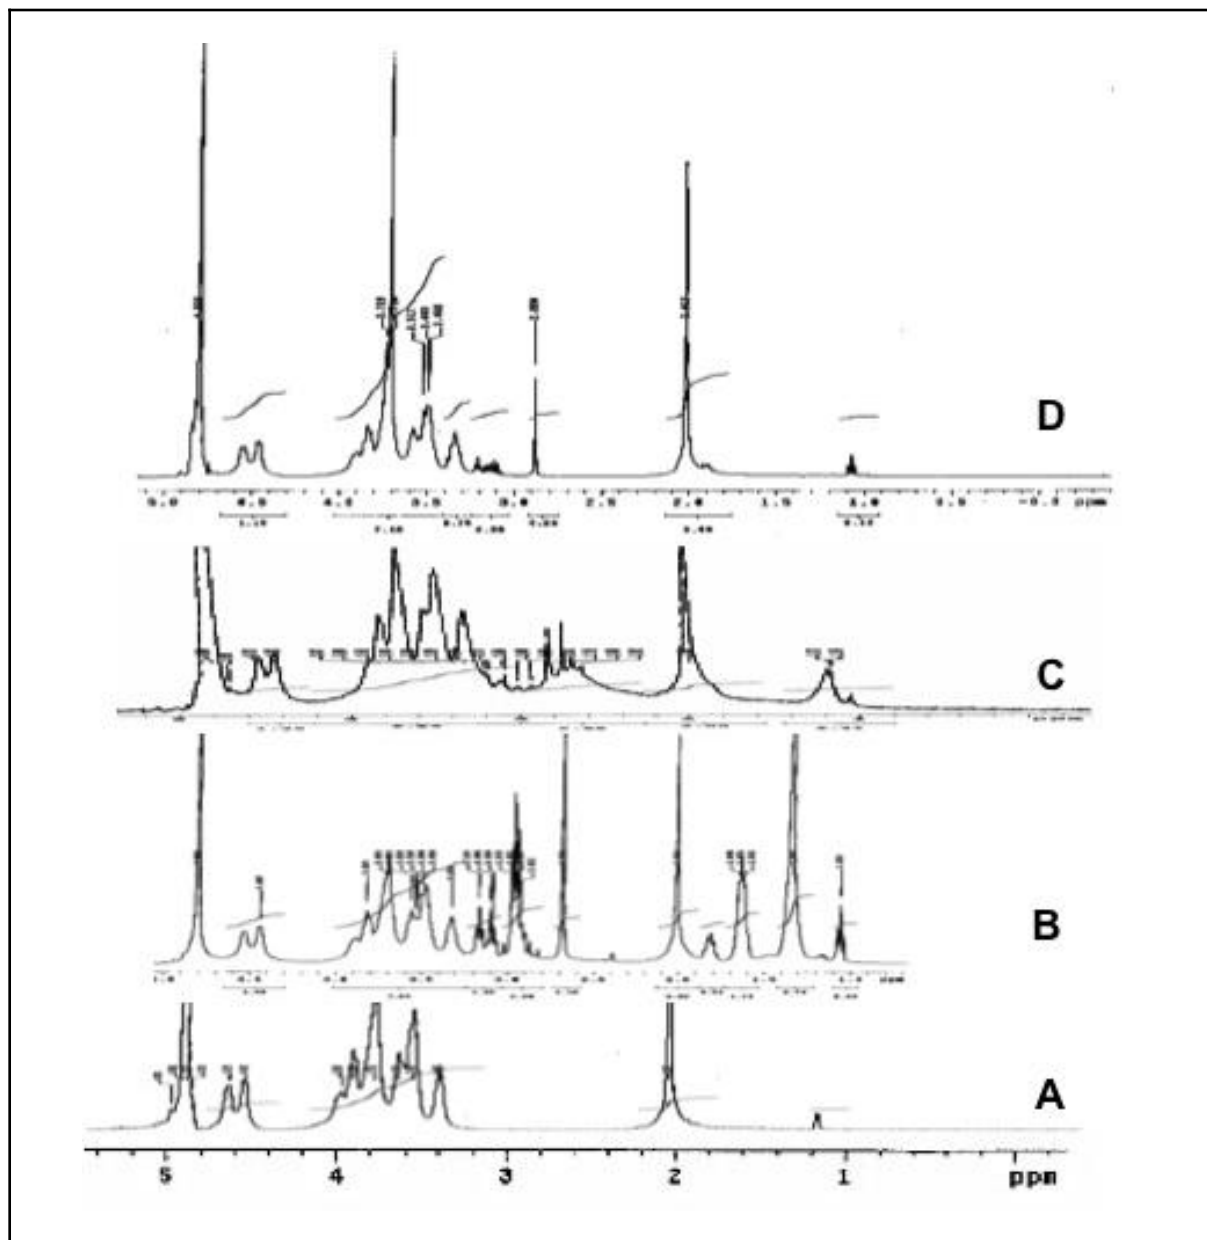

Supplement: NIHMS440848-supplement-01.pdf [file NIHMS440848-supplement-01.pdf]
